# Supplementary material
Source: PubMed Central journal article supplement (PMC4911824)
Supplement: NIHMS787251-supplement-Supplemental_Material.pdf [file NIHMS787251-supplement-Supplemental_Material.pdf]

## **SUPPLEMENTAL MATERIAL**

### **Association of Central Adiposity With Adverse Cardiac Mechanics:**

#### **Findings from the HyperGEN Study**

Selvaraj et al: Central Adiposity and Cardiac Mechanics

Senthil Selvaraj, MD, MA; Eva E. Martinez, BA; Frank G. Aguilar, MPH;  
Kwang-Youn A. Kim, PhD; Jie Peng, MS; Jin Sha, MS; Marguerite R. Irvin, PhD;  
Cora E. Lewis, MD, MSPH; Steven C. Hunt, PhD; Donna K. Arnett, PhD, MSPH;  
Sanjiv J. Shah, MD

**Supplemental Table 1. Reproducibility of Speckle-Tracking Echocardiography Parameters (N=96)**

| Parameter        | Mean±SD  | Interobserver Reliability |                       |       | Intraobserver Reliability |                       |       |
|------------------|----------|---------------------------|-----------------------|-------|---------------------------|-----------------------|-------|
|                  |          | ICC<br>(95% CI)           | Mean bias<br>(95% CI) | CV    | ICC<br>(95% CI)           | Mean bias<br>(95% CI) | CV    |
| GLS, %           | 15.3±2.7 | 0.77 (0.69, 0.85)         | 0.71 (0.34, 1.08)     | 9.9%  | 0.90 (0.87, 0.94)         | -0.17 (-0.46, 0.11)   | 7.2%  |
| Septal e', cm/s  | 3.4±1.0  | 0.77 (0.69, 0.86)         | 0.06 (-0.08, 0.21)    | 13.8% | 0.78 (0.70, 0.85)         | 0.12 (-0.007, 0.25)   | 13.7% |
| Lateral e', cm/s | 2.7±1.1  | 0.76 (0.67, 0.84)         | -0.11 (-0.28, 0.06)   | 26.9% | 0.81 (0.75, 0.88)         | -0.09 (-0.24, 0.06)   | 22.3% |

GLS = longitudinal strain; SD, standard deviation; ICC = intraclass correlation; CI, confidence interval; CV = coefficient of variation

**Supplemental Table 2. Association of Waist-Hip Ratio with Cardiac Mechanics and Filling Pressures on Sensitivity Analysis\***

| Dependent variable                           | Serum Aldosterone Adjustment |         | HOMA-IR Adjustment   |         | Triglyceride and HDL Adjustment |         | Number of Comorbidities Adjustment |         |
|----------------------------------------------|------------------------------|---------|----------------------|---------|---------------------------------|---------|------------------------------------|---------|
|                                              | $\beta$ (95% CI)             | P-value | $\beta$ (95% CI)     | P-value | $\beta$ (95% CI)                | P-value | $\beta$ (95% CI)                   | P-value |
| Global longitudinal strain, %                | -0.23 (-0.40, -0.06)         | 0.008   | -0.24 (-0.43, -0.06) | 0.01    | -0.21 (-0.38, -0.03)            | 0.02    | -0.22 (-0.39, -0.04)               | 0.01    |
| Early diastolic strain rate, s <sup>-1</sup> | -0.03 (-0.04, -0.02)         | <0.001  | -0.03 (-0.05, -0.02) | <0.001  | -0.03 (-0.04, -0.01)            | <0.001  | -0.03 (-0.04, -0.01)               | <0.001  |
| e' velocity, cm/s                            | -0.13 (-0.20, 0.07)          | <0.001  | -0.16 (-0.22, -0.09) | <0.001  | -0.12 (-0.18, -0.05)            | <0.001  | -0.12 (-0.18, -0.06)               | <0.001  |
| E/e' ratio                                   | 1.00 (0.21, 1.81)            | 0.01    | 0.79 (0.01, 1.56)    | 0.046   | 0.88 (0.06, 1.69)               | 0.04    | 0.77 (-0.03, 1.57)                 | 0.059   |

HOMA-IR, homeostasis model assessment-estimated insulin resistance; HDL, high-density lipoprotein; CI, confidence interval. All strain parameters are reported as absolute values. Beta-coefficients are per 1-SD increase in waist-hip ratio.

\*All models adjusted for age, sex, race, body-mass index, systolic blood pressure, heart rate, smoking status, serum fasting glucose, total cholesterol, estimated glomerular filtration rate, anti-hypertensive medication use, left ventricular mass, wall motion abnormalities, ejection fraction, center, speckle-tracking analyst, and image quality. Beta-coefficients for the additional adjustment for 1) serum aldosterone, 2) HOMA-IR, 3) triglyceride and HDL level (instead of total cholesterol), and 4) number of comorbidities are shown here.

**Supplemental Table 3. Association of Markers of Subcutaneous Adiposity with Cardiac Mechanics and Filling Pressures After Multivariable Adjustment\***

| Dependent variable                           | Subscapularis Skinfold Thickness |         | Triceps Skinfold Thickness    |         |
|----------------------------------------------|----------------------------------|---------|-------------------------------|---------|
|                                              | $\beta$ -Coefficient (95% CI)    | P-value | $\beta$ -Coefficient (95% CI) | P-value |
| Global longitudinal strain, %                | -0.18 (-0.39, 0.03)              | 0.09    | -0.10 (-0.31, 0.10)           | 0.33    |
| Peak systolic strain rate, s <sup>-1</sup>   | -0.01 (-0.02, 0.00)              | 0.13    | -0.01 (-0.03, -0.00)          | 0.048   |
| Early diastolic strain rate, s <sup>-1</sup> | -0.01 (-0.03, 0.00)              | 0.14    | -0.00 (-0.02, 0.01)           | 0.68    |
| Systolic (s') velocity, cm/s                 | -0.04 (-0.11, 0.02)              | 0.20    | -0.08 (-0.14, -0.01)          | 0.02    |
| Early diastolic (e') velocity, cm/s          | -0.15 (-0.23, -0.07)             | <0.001  | -0.12 (-0.19, -0.04)          | 0.004   |
| E/e' ratio                                   | 1.18 (0.16, 2.19)                | 0.02    | 0.70 (-0.29, 1.68)            | 0.17    |

BMI, body-mass index; CI, confidence interval. All strain parameters are reported as absolute values. Beta-coefficients are per 1-SD increase in each marker of subcutaneous adiposity.

\*Adjusted for age, sex, race, body-mass index, systolic blood pressure, heart rate, smoking status, serum fasting glucose, total cholesterol, estimated glomerular filtration rate, anti-hypertensive medication use, left ventricular mass, wall motion abnormalities, ejection fraction, center, speckle-tracking analyst, and image quality.

**Supplemental Table 4. Association of Residuals from Regression of Body Mass Index and Waist-Hip Ratio with Indices of Cardiac Mechanics and Filling Pressures**

| <b>Cardiac mechanics parameter</b>           | <b>P-value</b> |
|----------------------------------------------|----------------|
| Global longitudinal strain, %                | <0.001         |
| Peak systolic strain rate, s <sup>-1</sup>   | 0.001          |
| Early diastolic strain rate, s <sup>-1</sup> | <0.001         |
| Systolic (s') velocity, cm/s                 | 0.005          |
| Early diastolic (e') velocity, cm/s          | <0.001         |
| E/e' ratio                                   | <0.001         |

## **HyperGEN Participating Institutions and Principal Staff**

Network Center/University of Utah Field Center: Steven C. Hunt, Roger R. Williams, Hilary Coon, Paul N. Hopkins, Janet Hood, Lily Wu, Jan Skuppin; University of Alabama at Birmingham Field Center: Albert Oberman, Cora E. Lewis, Michael T. Weaver, Phillip Johnson, Susan Walker, Christie Oden; Boston University/Framingham Field Center: R. Curtis Ellison, Richard H. Myers, Yuqing Zhang, Luc Djoussé, Jemma B. Wilk, Greta Lee Splansky; University of Minnesota Field Center: Donna Arnett, Aaron R. Folsom, Mike Miller, Jim Pankow, Gregory Feitl, Barb Lux; University of North Carolina Field Center: Gerardo Heiss, Barry I. Freedman, Kari North, Kathryn Rose, Amy Haire; Data Coordinating Center, Washington University: D.C. Rao, Michael A. Province, Ingrid B. Borecki, Avril Adelman, Derek Morgan, Karen Schwander, David Lehner, Aldi Kraja, Stephen Mandel; Central Biochemistry Laboratory, University of Minnesota: John H. Eckfeldt, Catherine Leiendecker-Foster, Ronald C. McGlennen, Greg Rynders, Michael Y. Tsai, Jean Bucksa; Molecular Genetics Laboratory, University of Utah: Mark Leppert, Steven C. Hunt, Jean-Marc Lalouel, Robert Weiss; National Heart, Lung, and Blood Institute: Susan E. Old, Millicent Higgins, Cashell Jaquish, Martha Lundberg, Mariana Gerschenson. Echocardiographic reading center, Weill Cornell Medical College: Richard B. Devereux, Giovanni de Simone, Jonathan N. Bella
